# Supplementary material for: Pipeline design to identify key features and classify the chemotherapy response on lung cancer patients using large-scale genetic data
Source: BMC Syst Biol. 2018 Nov 20;12(Suppl 5):97. doi: 10.1186/s12918-018-0615-5 (PMC6245589; doi:10.1186/s12918-018-0615-5)
Supplement: Supplementary file 3 — 1159 key features explored with Regulomedb database that are identified with the top 20 pipelines ranked by CV F1 score. (CSV 31 kb) [file 12918_2018_615_MOESM3_ESM.csv]

Chromosome	Position	SNP alias	Regulomedb score
chr1	2082488	rs262669	1f
chr1	3732638	rs6702916	1f
chr1	3736318	rs9424303	1f
chr10	1623405	rs10903495	1f
chr10	1624283	rs4880878	1f
chr10	1634984	rs34573477	1f
chr2	118912	rs10519439	1f
chr4	1332174	rs13147602	1f
chr1	3167744	rs35272378	2a
chr1	913426	rs5772020	2b
chr1	940809	rs58913475	2b
chr1	950113	rs140258289	2b
chr1	1164537	rs77668548	2b
chr1	1227664	rs3831920	2b
chr1	1299736	rs2313198	2b
chr1	1407371	rs188574574	2b
chr1	1467484	rs1987191	2b
chr1	1898827	rs34824947	2b
chr1	2120733	rs34825103	2b
chr1	2173503	rs263526	2b
chr1	2203157	rs35691128	2b
chr1	2221837	rs878093	2b
chr1	2278980	rs2643910	2b
chr1	2324335	rs3820010	2b
chr1	2332665	rs77784287	2b
chr1	2342566	rs72642198	2b
chr1	2346481	rs4648839	2b
chr1	2362763	rs10797424	2b
chr1	2392647	rs2477686	2b
chr1	2399118	rs2494632	2b
chr1	2436302	rs79405490	2b
chr1	2844066	rs4648437	2b
chr1	2950093	rs58052947	2b
chr1	3138557	rs34313490	2b
chr1	3204355	rs75758397	2b
chr1	3306308	rs74711221	2b
chr1	3326301	rs199507963	2b
chr1	3349512	rs2493272	2b
chr1	3421362	rs2487686	2b
chr1	3422641	rs2247236	2b
chr1	3625806	rs34768796	2b
chr1	3644857	rs2236365	2b
chr1	4068244	rs12744667	2b
chr1	4105588	rs34905442	2b
chr1	4404343	rs16838750	2b
chr10	1623419	rs7077393	2b
chr10	1623488	rs10751805	2b
chr17	47528391	rs114731294	2b
chr19	690547	rs10422064	2b
chr2	290074	rs4603795	2b
chr2	468506	rs115839239	2b
chr2	558859	rs6749825	2b
chr2	850891	rs4854402	2b
chr2	862183	rs13006902	2b
chr2	949195	rs7559853	2b
chr2	1046893	rs77602058	2b
chr2	1076112	rs11127455	2b
chr6	710762	rs2297833	2b
chr8	435579	rs76547447	2b
chr1	3348267	rs2493274	2c
chr1	905131	rs34160727	3a
chr1	1302659	rs113127973	3a
chr1	1303333	rs34891103	3a
chr1	1486902	rs3766176	3a
chr1	1530196	rs4648789	3a
chr1	1690126	rs398089081	3a
chr1	1902465	rs137927575	3a
chr1	2040776	rs4648806	3a
chr1	2338657	rs58827215	3a
chr1	2387827	rs12734526	3a
chr1	2465911	rs6661956	3a
chr1	2915333	rs12023273	3a
chr1	2971451	rs56069604	3a
chr1	3030927	rs34699619	3a
chr1	3045891	rs61765200	3a
chr1	3047361	rs34616112	3a
chr1	3325333	rs12063613	3a
chr1	3374359	rs12745860	3a
chr1	3527482	rs148869898	3a
chr1	3594413	rs1122639	3a
chr1	3814993	rs12093013	3a
chr1	4105301	rs71580240	3a
chr1	4508171	rs705684	3a
chr1	4550103	rs706145	3a
chr1	4610147	rs6690675	3a
chr10	1623498	rs2676725	3a
chr10	1623733	rs10903496	3a
chr14	21721961	rs143335891	3a
chr19	34206080	rs74816550	3a
chr2	142136	rs437409	3a
chr2	145645	rs405258	3a
chr2	153370	rs372802	3a
chr2	726735	rs3924383	3a
chr9	1001921	rs10816242	3a
chr1	918237	rs28552711	4
chr1	920732	rs6677131	4
chr1	934098	rs2710867	4
chr1	957119	rs3121553	4
chr1	990279	rs4275402	4
chr1	1015086	rs147888107	4
chr1	1077961	rs55750860	4
chr1	1109957	rs11260541	4
chr1	1135241	rs9729550	4
chr1	1144695	rs111842318	4
chr1	1157624	rs74374908	4
chr1	1217019	rs1262895	4
chr1	1302709	rs138283838	4
chr1	1307599	rs35860770	4
chr1	1309884	rs35745967	4
chr1	1362150	rs11800029	4
chr1	1529997	rs28689700	4
chr1	1867425	rs2803320	4
chr1	1882286	rs2490540	4
chr1	1926086	rs6661597	4
chr1	2139306	rs2503713	4
chr1	2187084	rs260508	4
chr1	2222075	rs903921	4
chr1	2227165	rs2971438	4
chr1	2235661	rs2645073	4
chr1	2339073	rs2494428	4
chr1	2375505	rs6678847	4
chr1	2379704	rs942820	4
chr1	2381567	rs867810	4
chr1	2381621	rs867809	4
chr1	2391366	rs16824399	4
chr1	2520301	rs6667564	4
chr1	2722821	rs56406535	4
chr1	2727803	rs10909880	4
chr1	2735265	rs34936518	4
chr1	2833742	rs1563468	4
chr1	3107286	rs12142172	4
chr1	3133421	rs2817145	4
chr1	3145995	rs58620949	4
chr1	3160073	rs2455145	4
chr1	3230519	rs34708358	4
chr1	3252006	rs4648478	4
chr1	3308497	rs2493268	4
chr1	3319338	rs192554855	4
chr1	3320030	rs2483219	4
chr1	3325143	rs12097446	4
chr1	3348093	rs144148715	4
chr1	3349077	rs2483244	4
chr1	3371861	rs75368965	4
chr1	3373966	rs2493256	4
chr1	3394120	rs56341824	4
chr1	3400724	rs12124659	4
chr1	3405295	rs4648505	4
chr1	3407998	rs116356157	4
chr1	3441701	rs115852179	4
chr1	3493849	rs2821054	4
chr1	3494694	rs12406782	4
chr1	3521715	rs3072238	4
chr1	3525606	rs36031771	4
chr1	3529388	rs10909987	4
chr1	3534705	rs10909988	4
chr1	3587545	rs3765697	4
chr1	3587557	rs3765698	4
chr1	3606549	rs3765725	4
chr1	3606625	rs3765727	4
chr1	3606849	rs3765728	4
chr1	3773399	rs56262042	4
chr1	3831231	rs35241263	4
chr1	3833320	rs61770388	4
chr1	4191858	rs77586751	4
chr1	4331174	rs72631051	4
chr1	4422677	rs12403556	4
chr1	4472012	rs10915529	4
chr1	4523389	rs687951	4
chr1	4555991	rs2446692	4
chr1	4556987	rs350200	4
chr1	4562751	rs661886	4
chr1	4576796	rs1710430	4
chr1	4613510	rs241252	4
chr1	4623888	rs55956326	4
chr10	1618766	rs4995171	4
chr10	1623468	rs10751804	4
chr10	1623507	rs2813387	4
chr10	1623766	rs2813388	4
chr10	1624022	rs4880877	4
chr10	1624182	rs2676723	4
chr10	1637135	rs6560743	4
chr10	84492625	rs2820103	4
chr11	959775	rs7944815	4
chr14	21127940	rs6571333	4
chr15	58670667	rs35794427	4
chr15	67460625	rs17228313	4
chr17	47518041	rs144767484	4
chr2	264226	rs7584915	4
chr2	274671	rs62114548	4
chr2	439252	rs78694691	4
chr2	440588	rs2685231	4
chr2	464788	rs55945295	4
chr2	527945	rs6736819	4
chr2	554749	rs2724920	4
chr2	569138	rs2724918	4
chr2	656722	rs74507244	4
chr2	657953	rs17042288	4
chr2	662450	rs10674753	4
chr2	716098	rs201475186	4
chr2	760233	rs12616438	4
chr2	850554	rs10779979	4
chr2	946506	rs13387866	4
chr2	1036912	rs76866258	4
chr2	1074216	rs11885848	4
chr2	1502666	rs28912984	4
chr4	2283709	rs28714357	4
chr4	104595381	rs12649621	4
chr1	757639	rs3115853	5
chr1	869122	rs56190854	5
chr1	891020	rs13302957	5
chr1	907170	rs113797882	5
chr1	909418	rs28548431	5
chr1	914851	rs13303368	5
chr1	917639	rs41285816	5
chr1	953677	rs113454255	5
chr1	1007202	rs4633229	5
chr1	1021345	rs10907177	5
chr1	1021582	rs10907178	5
chr1	1025269	rs72631896	5
chr1	1043742	rs12751333	5
chr1	1067864	rs9442358	5
chr1	1080285	rs1539638	5
chr1	1097099	rs1539634	5
chr1	1119795	rs74989427	5
chr1	1131440	rs12403745	5
chr1	1133076	rs2274789	5
chr1	1161779	rs113791678	5
chr1	1221137	rs11260578	5
chr1	1226422	rs12743218	5
chr1	1261132	rs3813208	5
chr1	1301387	rs71628956	5
chr1	1323143	rs35654872	5
chr1	1336677	rs17139966	5
chr1	1387890	rs1624483	5
chr1	1411645	rs1151487	5
chr1	1411895	rs34013345	5
chr1	1421990	rs860213	5
chr1	1425411	rs2649579	5
chr1	1425699	rs819980	5
chr1	1432352	rs34621879	5
chr1	1432484	rs111691241	5
chr1	1449590	rs144094893	5
chr1	1451488	rs9439459	5
chr1	1451489	rs9439460	5
chr1	1460905	rs10796394	5
chr1	1468474	rs6677993	5
chr1	1468557	rs6694773	5
chr1	1468632	rs6690064	5
chr1	1469032	rs2889625	5
chr1	1472539	rs1571148	5
chr1	1552754	rs6604985	5
chr1	1555365	rs9329576	5
chr1	1615347	rs7520934	5
chr1	1615704	rs28774670	5
chr1	1625548	rs34721906	5
chr1	1628196	rs61776802	5
chr1	1639045	rs138369165	5
chr1	1647276	rs4437818	5
chr1	1672911	rs143439549	5
chr1	1680035	rs4648620	5
chr1	1683564	rs17162846	5
chr1	1688191	rs2281173	5
chr1	1732626	rs12130589	5
chr1	1775174	rs11260622	5
chr1	1846764	rs2247560	5
chr1	1855707	rs112908077	5
chr1	1884029	rs151085750	5
chr1	1900431	rs61776964	5
chr1	1917471	rs13303173	5
chr1	1942413	rs10436728	5
chr1	1947754	rs2376804	5
chr1	1953017	rs3128320	5
chr1	1959977	rs28409373	5
chr1	1962632	rs16824627	5
chr1	1962818	rs16824628	5
chr1	1963081	rs115150958	5
chr1	1963107	rs75228171	5
chr1	1963108	rs76776094	5
chr1	1963157	rs34893555	5
chr1	1963157	rs34893555	5
chr1	1964774	rs72636359	5
chr1	1964811	rs72636360	5
chr1	1965426	rs55833012	5
chr1	1986053	rs188957391	5
chr1	1991161	rs1878747	5
chr1	1993721	rs13303346	5
chr1	1995172	rs79468860	5
chr1	2008441	rs2490550	5
chr1	2027169	rs6603814	5
chr1	2033373	rs3107137	5
chr1	2045375	rs61775448	5
chr1	2075813	rs3128303	5
chr1	2117557	rs3123595	5
chr1	2141944	rs1105270	5
chr1	2223257	rs2132303	5
chr1	2223644	rs884941	5
chr1	2223865	rs884940	5
chr1	2251159	rs12082516	5
chr1	2253368	rs72642142	5
chr1	2260049	rs2645063	5
chr1	2268579	rs12085675	5
chr1	2273904	rs1472319	5
chr1	2308028	rs12070746	5
chr1	2353703	rs9424314	5
chr1	2358757	rs2494587	5
chr1	2359279	rs2494435	5
chr1	2363326	rs2494640	5
chr1	2373167	rs6673880	5
chr1	2401363	rs4648637	5
chr1	2408833	rs11588930	5
chr1	2416356	rs4648639	5
chr1	2465143	rs9803764	5
chr1	2523806	rs192349427	5
chr1	2536812	rs72646003	5
chr1	2537463	rs4074789	5
chr1	2539180	rs10910107	5
chr1	2540342	rs12046118	5
chr1	2540363	rs10797439	5
chr1	2551659	rs10797441	5
chr1	2555639	rs28568531	5
chr1	2616439	rs6662172	5
chr1	2624135	rs61765743	5
chr1	2625511	rs4648682	5
chr1	2625550	rs61765754	5
chr1	2626084	rs28619423	5
chr1	2626088	rs28373809	5
chr1	2626096	rs28648843	5
chr1	2626103	rs28458955	5
chr1	2626260	rs28707614	5
chr1	2632096	rs12751643	5
chr1	2711630	rs11810740	5
chr1	2727637	rs10909879	5
chr1	2738264	rs11584658	5
chr1	2774380	rs12567869	5
chr1	2776760	rs897617	5
chr1	2795536	rs6679954	5
chr1	2798456	rs1563474	5
chr1	2798711	rs4373707	5
chr1	2799046	rs2377038	5
chr1	2811987	rs1456466	5
chr1	2812243	rs10909834	5
chr1	2835908	rs2606409	5
chr1	2837770	rs4997489	5
chr1	2843246	rs112848978	5
chr1	2843380	rs28361890	5
chr1	2844961	rs10797364	5
chr1	2844973	rs10797365	5
chr1	2846273	rs897635	5
chr1	2850111	rs4648440	5
chr1	2858547	rs12029140	5
chr1	2859723	rs2842909	5
chr1	2861881	rs58118046	5
chr1	2883040	rs10909847	5
chr1	2889147	rs4648444	5
chr1	2891277	rs61763599	5
chr1	2891279	rs61763637	5
chr1	2897464	rs2495272	5
chr1	2898493	rs17391563	5
chr1	2916355	rs59653178	5
chr1	2918789	rs67014609	5
chr1	2961022	rs72630906	5
chr1	2973432	rs2993481	5
chr1	2974851	rs2376821	5
chr1	2998021	rs2788094	5
chr1	2999023	rs11578424	5
chr1	3001756	rs2742682	5
chr1	3009063	rs5772096	5
chr1	3009968	rs7543737	5
chr1	3010702	rs734373	5
chr1	3010968	rs734374	5
chr1	3011285	rs2981874	5
chr1	3011557	rs10449221	5
chr1	3013632	rs2817167	5
chr1	3014034	rs2817170	5
chr1	3026508	rs59909070	5
chr1	3035736	rs2981864	5
chr1	3044180	rs2817174	5
chr1	3046351	rs2742669	5
chr1	3046710	rs35625823	5
chr1	3048322	rs2050703	5
chr1	3049854	rs35999894	5
chr1	3082250	rs144090205	5
chr1	3093749	rs2817131	5
chr1	3094830	rs17390167	5
chr1	3106382	rs7545871	5
chr1	3111210	rs113208842	5
chr1	3144482	rs1553289	5
chr1	3146598	rs2651886	5
chr1	3147908	rs905131	5
chr1	3149407	rs2817159	5
chr1	3164015	rs2937391	5
chr1	3179702	rs6656462	5
chr1	3182237	rs2500248	5
chr1	3198328	rs114553524	5
chr1	3223954	rs4145901	5
chr1	3228151	rs74048222	5
chr1	3244794	rs79823300	5
chr1	3250422	rs1889121	5
chr1	3253888	rs7516150	5
chr1	3254340	rs1572038	5
chr1	3258687	rs2483285	5
chr1	3258900	rs1999525	5
chr1	3263502	rs2500258	5
chr1	3264296	rs2500257	5
chr1	3292875	rs4648488	5
chr1	3300497	rs10909935	5
chr1	3313281	rs7535965	5
chr1	3313512	rs871824	5
chr1	3315358	rs12144338	5
chr1	3322429	rs77862416	5
chr1	3325877	rs59691927	5
chr1	3330108	rs148003174	5
chr1	3330191	rs112206206	5
chr1	3352346	rs1537405	5
chr1	3383592	rs3893316	5
chr1	3395038	rs10797395	5
chr1	3421540	rs2794357	5
chr1	3421607	rs60864742	5
chr1	3422987	rs877510	5
chr1	3422987	rs877510	5
chr1	3425866	rs2794359	5
chr1	3431528	rs947349	5
chr1	3435382	rs79899647	5
chr1	3438178	rs2794366	5
chr1	3474625	rs2821063	5
chr1	3477414	rs138354618	5
chr1	3503353	rs10909977	5
chr1	3556455	rs2760317	5
chr1	3598490	rs113874189	5
chr1	3609396	rs879621	5
chr1	3611652	rs76412586	5
chr1	3632607	rs3753211	5
chr1	3736922	rs58074017	5
chr1	3737398	rs144756645	5
chr1	3744272	rs75376818	5
chr1	3749101	rs61768913	5
chr1	3758492	rs17412654	5
chr1	3769870	rs11578070	5
chr1	3769970	rs78653465	5
chr1	3779817	rs77486118	5
chr1	3800479	rs7555538	5
chr1	4005044	rs11585024	5
chr1	4005717	rs7513058	5
chr1	4015381	rs6681347	5
chr1	4024325	rs11584552	5
chr1	4026320	rs10915483	5
chr1	4031326	rs3935162	5
chr1	4035672	rs10799227	5
chr1	4064782	rs6426429	5
chr1	4067511	rs6702213	5
chr1	4069870	rs35514116	5
chr1	4076043	rs12026411	5
chr1	4085950	rs4654612	5
chr1	4089813	rs34117538	5
chr1	4119732	rs7412152	5
chr1	4159378	rs10799199	5
chr1	4192489	rs12143754	5
chr1	4214827	rs41434152	5
chr1	4231630	rs10915461	5
chr1	4231795	rs6688428	5
chr1	4231966	rs149330411	5
chr1	4268593	rs12095632	5
chr1	4269173	rs35225148	5
chr1	4291841	rs7541544	5
chr1	4338957	rs988078	5
chr1	4364351	rs35994072	5
chr1	4364471	rs1106307	5
chr1	4364563	rs2132176	5
chr1	4364940	rs3007778	5
chr1	4365470	rs351625	5
chr1	4366005	rs56198562	5
chr1	4382978	rs13375925	5
chr1	4403526	rs114023934	5
chr1	4405495	rs656035	5
chr1	4411305	rs629569	5
chr1	4411346	rs675895	5
chr1	4422229	rs16838800	5
chr1	4424067	rs61676533	5
chr1	4455924	rs150457433	5
chr1	4492886	rs12130475	5
chr1	4514081	rs1235308	5
chr1	4520299	rs620018	5
chr1	4520866	rs622684	5
chr1	4521319	rs61771168	5
chr1	4533864	rs149429945	5
chr1	4534349	rs12143782	5
chr1	4541043	rs638289	5
chr1	4543241	rs16839093	5
chr1	4547229	rs350176	5
chr1	4547327	rs350177	5
chr1	4547402	rs350178	5
chr1	4547521	rs350179	5
chr1	4548291	rs350182	5
chr1	4548617	rs350184	5
chr1	4549480	rs585641	5
chr1	4549481	rs667500	5
chr1	4551551	rs780613	5
chr1	4556892	rs350199	5
chr1	4561961	rs582598	5
chr1	4563324	rs71640931	5
chr1	4565950	rs12133282	5
chr1	4566417	rs34567044	5
chr1	4568699	rs706146	5
chr1	4576474	rs1762830	5
chr1	4578753	rs12039814	5
chr1	4580782	rs1229149	5
chr1	4581584	rs608203	5
chr1	4586605	rs780983	5
chr1	4587968	rs241237	5
chr1	4590968	rs241232	5
chr1	4592158	rs67546827	5
chr1	4618532	rs916406	5
chr1	4621462	rs241267	5
chr1	4626266	rs241272	5
chr1	4626285	rs1515670	5
chr1	4630482	rs7526879	5
chr1	4633553	rs6673089	5
chr1	4633951	rs139228401	5
chr1	4654223	rs61767667	5
chr1	4671786	rs75477852	5
chr1	4676168	rs164776	5
chr1	18437817	rs1869807	5
chr1	153999579	rs11578545	5
chr10	1618204	rs113348512	5
chr10	1618332	rs74108922	5
chr10	1618476	rs1574271	5
chr10	1618583	rs75794760	5
chr10	1618589	rs79554578	5
chr10	1618591	rs189089212	5
chr10	1618666	rs117391837	5
chr10	1618716	rs1574269	5
chr10	1618730	rs1320077	5
chr10	1619044	rs11280627	5
chr10	1619192	rs2813374	5
chr10	1619238	rs2813375	5
chr10	1619263	rs2676191	5
chr10	1619398	rs4991113	5
chr10	1619404	rs4991114	5
chr10	1619416	rs112452133	5
chr10	1619424	rs200090056	5
chr10	1619425	rs200368630	5
chr10	1619882	rs2813378	5
chr10	1619895	rs10794762	5
chr10	1620198	rs10794763	5
chr10	1620355	rs6560740	5
chr10	1620372	rs6560741	5
chr10	1620624	rs2813381	5
chr10	1620745	rs55714467	5
chr10	1620871	rs138276650	5
chr10	1620984	rs10903493	5
chr10	1621218	rs4880875	5
chr10	1621327	rs12256299	5
chr10	1621411	rs4880876	5
chr10	1621497	rs137889621	5
chr10	1621679	rs11250640	5
chr10	1621910	rs7894920	5
chr10	1622073	rs10794764	5
chr10	1622167	rs17156542	5
chr10	1622188	rs17156544	5
chr10	1622228	rs79186033	5
chr10	1622283	rs11816709	5
chr10	1622423	rs11815041	5
chr10	1622497	rs9663299	5
chr10	1622506	rs111684423	5
chr10	1622631	rs11250641	5
chr10	1622643	rs11250642	5
chr10	1622659	rs11816776	5
chr10	1622739	rs10903494	5
chr10	1623055	rs2676728	5
chr10	1623118	rs72764982	5
chr10	1623131	rs2676727	5
chr10	1623278	rs2813385	5
chr10	1623347	rs7095757	5
chr10	1624399	rs139882350	5
chr10	1624775	rs938695	5
chr10	1625107	rs4880879	5
chr10	1625151	rs2944718	5
chr10	1627111	rs36024156	5
chr10	1627214	rs71475806	5
chr10	1627496	rs2676196	5
chr10	1630855	rs72764993	5
chr10	1630913	rs72764994	5
chr10	1631687	rs2813394	5
chr10	1631690	rs2813395	5
chr10	1632756	rs146287917	5
chr10	1632953	rs74639447	5
chr10	1633028	rs11591324	5
chr10	1633522	rs72764998	5
chr10	1633557	rs12357752	5
chr10	1633584	rs56403583	5
chr10	1633850	rs113613762	5
chr10	1633853	rs4880884	5
chr10	1634294	rs148860310	5
chr10	1634429	rs2813396	5
chr10	1635919	rs10903507	5
chr10	1637208	rs2676187	5
chr10	1637262	rs12765719	5
chr10	1637344	rs2676186	5
chr10	1638387	rs7074422	5
chr10	1638466	rs7078255	5
chr10	1638526	rs7090242	5
chr10	1639361	rs7903852	5
chr10	1639426	rs7918273	5
chr10	1639551	rs72765001	5
chr10	84492247	rs2820101	5
chr10	84493789	rs2820105	5
chr11	295526	rs1060819	5
chr11	943939	rs151214855	5
chr11	1062192	rs12419042	5
chr13	19661492	rs11843865	5
chr13	114492955	rs9550239	5
chr14	22212817	rs4982492	5
chr15	71586524	rs112491701	5
chr17	133996	rs148928921	5
chr17	47535772	rs62077744	5
chr17	47541463	rs2671636	5
chr19	690925	rs34310921	5
chr19	877436	rs1617214	5
chr19	878158	rs111310751	5
chr2	153924	rs6734932	5
chr2	153947	rs443965	5
chr2	309038	rs113071838	5
chr2	314844	rs12465188	5
chr2	419381	rs11683339	5
chr2	419463	rs6726633	5
chr2	420069	rs2667198	5
chr2	429468	rs199505157	5
chr2	452155	rs67364346	5
chr2	458756	rs11904800	5
chr2	470601	rs7601245	5
chr2	508654	rs2954997	5
chr2	551145	rs2724889	5
chr2	564078	rs1320362	5
chr2	565825	rs11127477	5
chr2	593700	rs13001871	5
chr2	609176	rs2947415	5
chr2	640700	rs10166979	5
chr2	658458	rs115542712	5
chr2	659380	rs7591830	5
chr2	659383	rs7596985	5
chr2	670124	rs73153245	5
chr2	671380	rs12611628	5
chr2	715658	rs11885359	5
chr2	716502	rs4372938	5
chr2	720759	rs62103638	5
chr2	774221	rs140824102	5
chr2	776604	rs4854278	5
chr2	796495	rs76028322	5
chr2	815180	rs111851764	5
chr2	828827	rs143014741	5
chr2	838300	rs7603294	5
chr2	845353	rs181568367	5
chr2	845361	rs112208961	5
chr2	854571	rs11680935	5
chr2	857222	rs77501038	5
chr2	857269	rs66507545	5
chr2	857280	rs66467553	5
chr2	857740	rs73911130	5
chr2	858061	rs6548270	5
chr2	858261	rs35506104	5
chr2	859256	rs144023202	5
chr2	859627	rs112498510	5
chr2	860704	rs4425104	5
chr2	861577	rs4992458	5
chr2	862505	rs4854284	5
chr2	862546	rs4854285	5
chr2	872556	rs79745835	5
chr2	901134	rs13032627	5
chr2	906567	rs55784042	5
chr2	938235	rs13395970	5
chr2	986076	rs4971353	5
chr2	1015557	rs113940379	5
chr2	1030132	rs13432080	5
chr2	1059004	rs62105936	5
chr2	1064887	rs6761405	5
chr2	1069937	rs11127452	5
chr2	1073703	rs11127453	5
chr2	1074955	rs145301080	5
chr2	1075539	rs4971428	5
chr2	1076683	rs4971371	5
chr2	1085707	rs13424687	5
chr2	1089742	rs7557013	5
chr2	1094805	rs3935927	5
chr2	1095688	rs80337005	5
chr2	1099596	rs4971441	5
chr2	1100686	rs79702020	5
chr2	1463678	rs6588674	5
chr2	1759518	rs55934997	5
chr22	18498397	rs370870	5
chr22	44654738	rs135440	5
chr22	45394405	rs144795576	5
chr22	45394739	rs16991955	5
chr22	45395341	rs78770253	5
chr4	1624730	rs74605618	5
chr4	104585821	rs3796955	5
chr5	457954	rs2251843	5
chr5	43666352	rs62367656	5
chr6	1489299	rs6596827	5
chr6	6336921	rs3863223	5
chr7	54347733	rs73391684	5
chr8	314204	rs11785553	5
chr8	339918	rs58347868	5
chr8	433226	rs142089107	5
chr9	1002248	rs10816246	5
chr9	13097835	rs13301704	5
chr1	813746	rs4970388	6
chr1	1044143	rs71509467	6
chr1	1069424	rs9442375	6
chr1	1122936	rs28648687	6
chr1	1125773	rs72894023	6
chr1	1126086	rs9727406	6
chr1	1465819	rs35884575	6
chr1	1465927	rs60198831	6
chr1	1466827	rs6683520	6
chr1	1616547	rs202244077	6
chr1	1617456	rs144393021	6
chr1	1652143	rs201492260	6
chr1	1675150	rs115029489	6
chr1	1908294	rs147484570	6
chr1	1936133	rs13303219	6
chr1	1941629	rs28584852	6
chr1	2149137	rs6656309	6
chr1	2273143	rs12730050	6
chr1	2302113	rs34105463	6
chr1	2302470	rs2453567	6
chr1	2513677	rs2016366	6
chr1	2532123	rs141426426	6
chr1	2553012	rs201235538	6
chr1	2579444	rs57209476	6
chr1	2696581	rs144142039	6
chr1	3025467	rs34467003	6
chr1	3156465	rs2455112	6
chr1	3173420	rs142527363	6
chr1	3219073	rs76166764	6
chr1	3363961	rs34792713	6
chr1	3536459	rs4648535	6
chr1	3575878	rs2208992	6
chr1	3790000	rs35371895	6
chr1	3793239	rs6670589	6
chr1	4009483	rs6668397	6
chr1	4034950	rs10915513	6
chr1	4057388	rs12756251	6
chr1	4057401	rs12733769	6
chr1	4082366	rs10799261	6
chr1	4097020	rs59310770	6
chr1	4101612	rs7535448	6
chr1	4133900	rs11589171	6
chr1	4162832	rs12130558	6
chr1	4184255	rs34229808	6
chr1	4241086	rs112449630	6
chr1	4246828	rs60526833	6
chr1	4288551	rs1874266	6
chr1	4291261	rs6426406	6
chr1	4369099	rs2087571	6
chr1	4390003	rs33923011	6
chr1	4440512	rs590798	6
chr1	4465644	rs12145982	6
chr1	4477084	rs10915530	6
chr1	4480469	rs1309839	6
chr1	4503101	rs12127881	6
chr1	4507659	rs780592	6
chr1	4534501	rs142727808	6
chr1	4586305	rs241240	6
chr1	4587518	rs241238	6
chr1	4589163	rs241236	6
chr1	4589409	rs241234	6
chr1	4591621	rs241231	6
chr1	4594405	rs74410595	6
chr1	4594771	rs112134215	6
chr1	4596277	rs10915553	6
chr1	4599035	rs148236167	6
chr1	4599834	rs28694108	6
chr1	4602118	rs5772167	6
chr1	4606470	rs12092980	6
chr1	4620010	rs143362011	6
chr1	4622639	rs241268	6
chr1	4634977	rs1541318	6
chr1	4636019	rs35427801	6
chr1	4659247	rs7528368	6
chr1	4680774	rs7519182	6
chr1	41813486	rs57534790	6
chr1	51651843	rs12134876	6
chr1	154420332	rs113580743	6
chr10	1622956	rs7074330	6
chr10	1625243	rs12259438	6
chr10	1625391	rs5782585	6
chr10	1625492	rs4354632	6
chr10	1626547	rs57155417	6
chr10	1627968	rs3956254	6
chr10	1628090	rs2676707	6
chr10	1628172	rs10903499	6
chr10	1628288	rs10903500	6
chr10	1629031	rs2813393	6
chr10	1629423	rs117836674	6
chr10	1629737	rs35071728	6
chr10	1629991	rs72764992	6
chr10	1630381	rs4880881	6
chr10	1630609	rs75674894	6
chr10	1630611	rs4880882	6
chr10	53007282	rs56268218	6
chr10	84483508	rs2783406	6
chr10	84488936	rs2820099	6
chr10	84491774	rs2783417	6
chr10	84499756	rs10572087	6
chr11	9932171	rs9919633	6
chr11	81582521	rs117678731	6
chr11	81638409	rs77268299	6
chr13	71166729	rs35736723	6
chr13	71167663	rs117249990	6
chr13	71168445	rs9542425	6
chr13	71171479	rs79298409	6
chr13	71177905	rs9572505	6
chr14	22213896	rs72688088	6
chr14	49912773	rs74046874	6
chr14	49913335	rs10142699	6
chr15	71593812	rs72759690	6
chr18	100082	rs56254327	6
chr18	6658281	rs36134088	6
chr19	689827	rs139212117	6
chr2	65913	rs62116664	6
chr2	77470	rs300766	6
chr2	107542	rs55932737	6
chr2	132489	rs300726	6
chr2	134248	rs300722	6
chr2	164984	rs300743	6
chr2	165002	rs300744	6
chr2	266906	rs10171111	6
chr2	370777	rs11692082	6
chr2	381869	rs78299278	6
chr2	403268	rs12614257	6
chr2	615626	rs7559547	6
chr2	630553	rs11302226	6
chr2	630661	rs6731688	6
chr2	657568	rs7574078	6
chr2	657651	rs4854350	6
chr2	699392	rs34299926	6
chr2	701985	rs6749061	6
chr2	724991	rs6722195	6
chr2	725002	rs67028241	6
chr2	828533	rs4513329	6
chr2	833967	rs34199256	6
chr2	976378	rs6716926	6
chr2	979247	rs13398145	6
chr2	983549	rs58086319	6
chr2	984852	rs55839937	6
chr2	997846	rs7598827	6
chr2	998522	rs4464316	6
chr2	999583	rs73908647	6
chr2	1001989	rs7422920	6
chr2	1022945	rs11691668	6
chr2	1058281	rs35713411	6
chr2	1058375	rs12611895	6
chr2	1073088	rs4971427	6
chr2	1081593	rs10865542	6
chr20	88923	rs139544739	6
chr22	18498188	rs57948046	6
chr22	18499573	rs56039231	6
chr22	18499675	rs383293	6
chr3	2542616	rs67775967	6
chr3	186612792	rs35255338	6
chr4	35754500	rs139142226	6
chr4	68078442	rs62315511	6
chr4	104569058	rs3796963	6
chr4	104573552	rs6854678	6
chr4	104580530	rs76385284	6
chr4	104581263	rs28695808	6
chr4	104584257	rs74589515	6
chr4	104584996	rs75544266	6
chr4	104585117	rs3796958	6
chr4	104585121	rs3796957	6
chr4	104585605	rs76735538	6
chr4	104590559	rs12647074	6
chr4	104597998	rs1544394	6
chr4	104618822	rs187468969	6
chr4	104627832	rs3796952	6
chr4	104628157	rs3796951	6
chr4	104631059	rs61397208	6
chr4	104631529	rs7672658	6
chr4	104638434	rs4141203	6
chr7	54303109	rs139832191	6
chr7	54307712	rs12531985	6
chr7	54313233	rs113867093	6
chr7	54330795	rs144234993	6
chr7	54337414	rs34517709	6
chr7	54351469	rs117736019	6
chr7	54390070	rs150279238	6
chr7	54393586	rs75020534	6
chr7	54396158	rs71546167	6
chr7	54417460	rs114572252	6
chr8	319765	rs11987545	6
chr8	1122416	rs11136354	6
chr8	119490849	rs2515031	6
chr9	1002279	rs12343006	6
chr9	13093908	rs10119393	6
chr9	13097056	rs147478025	6
chr9	13097570	rs62532649	6
chr9	13097607	rs10960944	6
chr9	13098908	rs55707745	6
chr9	13100079	rs2225484	6
chr1	766006	rs61768174	7
chr1	1038087	rs66622470	7
chr1	1466512	rs6670992	7
chr1	1466980	rs6688404	7
chr1	1611431	rs6700884	7
chr1	1647685	rs909823	7
chr1	1660977	rs1972183	7
chr1	1665014	rs79125954	7
chr1	1728968	rs12034740	7
chr1	1768893	rs10907188	7
chr1	1844045	rs2474460	7
chr1	1931528	rs6679335	7
chr1	1938472	rs6663186	7
chr1	1940386	rs28421659	7
chr1	1941833	rs13303060	7
chr1	1989495	rs75494970	7
chr1	2295937	rs6685453	7
chr1	2876769	rs6659133	7
chr1	2926972	rs11802804	7
chr1	3260469	rs9424292	7
chr1	3362255	rs867814	7
chr1	3584770	rs3765692	7
chr1	3745923	rs2275831	7
chr1	3760308	rs12145992	7
chr1	3768567	rs72640928	7
chr1	3790129	rs12130391	7
chr1	3811202	rs7515869	7
chr1	4026837	rs7417834	7
chr1	4092053	rs57277002	7
chr1	4096535	rs7555483	7
chr1	4098477	rs7516695	7
chr1	4139237	rs4073835	7
chr1	4197034	rs6702633	7
chr1	4206209	rs9426471	7
chr1	4220927	rs72852611	7
chr1	4227633	rs4468133	7
chr1	4244856	rs4654419	7
chr1	4246387	rs55674531	7
chr1	4259961	rs34626829	7
chr1	4319246	rs7545415	7
chr1	4343734	rs17408082	7
chr1	4347840	rs72855191	7
chr1	4384262	rs16838692	7
chr1	4393892	rs34457369	7
chr1	4394423	rs12021982	7
chr1	4417175	rs71580261	7
chr1	4423895	rs349390	7
chr1	4478441	rs12120157	7
chr1	4502491	rs10915538	7
chr1	4509105	rs780596	7
chr1	4516572	rs12131294	7
chr1	4525603	rs4654545	7
chr1	4525681	rs4654546	7
chr1	4533531	rs12140591	7
chr1	4533662	rs12143568	7
chr1	4533938	rs72633542	7
chr1	4537296	rs35604764	7
chr1	4547859	rs675942	7
chr1	4547862	rs639798	7
chr1	4547988	rs350180	7
chr1	4549100	rs350186	7
chr1	4554213	rs350193	7
chr1	4589261	rs241235	7
chr1	4592381	rs1515673	7
chr1	4596699	rs12080165	7
chr1	4599120	rs12089240	7
chr1	4599121	rs593171	7
chr1	4600668	rs541929	7
chr1	4602597	rs12753054	7
chr1	4602985	rs74773514	7
chr1	4605402	rs17348839	7
chr1	4607907	rs6678920	7
chr1	4608115	rs6679141	7
chr1	4610732	rs16839272	7
chr1	4612365	rs241249	7
chr1	4612751	rs12117466	7
chr1	4614007	rs241254	7
chr1	4617855	rs10799244	7
chr1	4623422	rs241269	7
chr1	4625918	rs977272	7
chr1	4627076	rs241273	7
chr1	4628330	rs28665533	7
chr1	4630341	rs16839328	7
chr1	4630383	rs7531281	7
chr1	4631403	rs55850443	7
chr1	4631935	rs150077056	7
chr1	4643856	rs587108	7
chr1	4668093	rs151715	7
chr1	4680882	rs12750191	7
chr10	1611164	rs10508213	7
chr10	1622870	rs2813384	7
chr10	1622899	rs142396504	7
chr10	1623034	rs7095293	7
chr10	1624899	rs10903497	7
chr10	1624940	rs938693	7
chr10	1625293	rs10794765	7
chr10	1625739	rs34184780	7
chr10	1625742	rs35430181	7
chr10	1625767	rs4880880	7
chr10	1625803	rs7912485	7
chr10	1625845	rs4478908	7
chr10	1625864	rs71475805	7
chr10	1626125	rs12782330	7
chr10	1626376	rs35193555	7
chr10	1626817	rs2676706	7
chr10	1626934	rs34294702	7
chr10	1627061	rs56016511	7
chr10	1628024	rs35505416	7
chr10	1628056	rs111350047	7
chr10	1628101	rs113241456	7
chr10	1628102	rs10903498	7
chr10	1628308	rs10903501	7
chr10	1628331	rs10903502	7
chr10	1628904	rs2813392	7
chr10	1629042	rs3916137	7
chr10	1629398	rs72764989	7
chr10	1629483	rs72764991	7
chr10	1630677	rs10903503	7
chr10	1630680	rs4880521	7
chr10	1631288	rs141901764	7
chr10	1631797	rs34647972	7
chr10	1632028	rs72764995	7
chr10	1634580	rs74872464	7
chr10	19564550	rs12243353	7
chr10	29090207	rs11007249	7
chr10	53000644	rs10996282	7
chr10	60711246	rs3910877	7
chr10	84483286	rs2251944	7
chr10	84483652	rs12246711	7
chr10	84485145	rs2494024	7
chr10	84485275	rs2248957	7
chr10	84485298	rs2050460	7
chr10	84485336	rs2248954	7
chr10	84486483	rs113518028	7
chr10	84487683	rs2820097	7
chr10	84488149	rs111276729	7
chr10	84491156	rs117710559	7
chr10	84496941	rs2644204	7
chr11	953307	rs11246355	7
chr13	71169729	rs192705870	7
chr13	71174592	rs77966964	7
chr13	71175213	rs75380328	7
chr13	71175981	rs7985973	7
chr14	22212462	rs2204935	7
chr14	49913831	rs34590387	7
chr14	49915544	rs8019711	7
chr14	49915634	rs12590483	7
chr15	55261406	rs11071160	7
chr15	71590489	rs72759685	7
chr15	71590500	rs12906632	7
chr15	71593922	rs7175468	7
chr15	79706692	rs11853785	7
chr15	79707120	rs8034632	7
chr15	79707128	rs8034352	7
chr16	76949413	rs1580765	7
chr17	4549473	rs116568477	7
chr17	12554469	rs34302734	7
chr17	47540122	rs1814451	7
chr18	588227	rs553009	7
chr19	689924	rs10408985	7
chr19	694120	rs62131273	7
chr2	21375	rs13409096	7
chr2	26843	rs7560258	7
chr2	104035	rs74487397	7
chr2	104978	rs7588043	7
chr2	129485	rs423038	7
chr2	181414	rs300692	7
chr2	299074	rs113893068	7
chr2	305202	rs6721594	7
chr2	369928	rs142659127	7
chr2	400978	rs62117021	7
chr2	403447	rs62117024	7
chr2	435314	rs2685229	7
chr2	437018	rs62104177	7
chr2	614997	rs6709992	7
chr2	662025	rs4241322	7
chr2	716951	rs10674244	7
chr2	722507	rs11127500	7
chr2	743935	rs12614593	7
chr2	799876	rs13009924	7
chr2	818297	rs12470925	7
chr2	828186	rs13412828	7
chr2	831084	rs4441510	7
chr2	834654	rs4854388	7
chr2	962065	rs13416840	7
chr2	983007	rs13411576	7
chr2	990973	rs115647664	7
chr2	1013930	rs140708557	7
chr2	1018804	rs78258236	7
chr2	1019180	rs60305990	7
chr2	1053586	rs4971425	7
chr2	1069333	rs11127451	7
chr2	1070781	rs13020106	7
chr2	1083363	rs11891572	7
chr2	1085648	rs4971434	7
chr2	49238335	rs181976401	7
chr2	156823827	rs141852479	7
chr2	171232438	rs67510921	7
chr2	171234010	rs10195131	7
chr20	861105	rs6086326	7
chr21	15849704	rs723856	7
chr22	17234948	rs75397198	7
chr22	18497245	rs59692059	7
chr22	18501542	rs2401499	7
chr3	1230008	rs6442270	7
chr3	1921859	rs13068382	7
chr3	2353514	rs1967597	7
chr3	2540631	rs151022560	7
chr3	186433715	rs59106543	7
chr4	96237394	rs115271408	7
chr4	104563609	rs186926800	7
chr4	104576130	rs3796961	7
chr4	104579826	rs180951745	7
chr4	104579937	rs7682099	7
chr4	104579938	rs7681765	7
chr4	104580808	rs79246187	7
chr4	104581270	rs28520042	7
chr4	104581486	rs58891807	7
chr4	104582815	rs11097822	7
chr4	104585956	rs2086646	7
chr4	104587895	rs1351624	7
chr4	104591605	rs57108287	7
chr4	104604781	rs199814935	7
chr4	104605001	rs149481187	7
chr4	104612879	rs7669205	7
chr4	104618872	rs76667154	7
chr4	104620521	rs78351120	7
chr4	104621029	rs141780425	7
chr4	104625251	rs143213793	7
chr4	104627329	rs77738990	7
chr4	104631409	rs59238590	7
chr4	104632883	rs143188031	7
chr4	104634179	rs139872400	7
chr4	104635862	rs56880262	7
chr4	104638048	rs114788623	7
chr6	2993418	rs6922134	7
chr6	6341753	rs9502437	7
chr6	95870502	rs115422916	7
chr7	54298962	rs143678990	7
chr7	54299318	rs9719550	7
chr7	54307680	rs73391604	7
chr7	54318862	rs6960882	7
chr7	54325920	rs4947459	7
chr7	54327606	rs73132250	7
chr7	54341331	rs56398891	7
chr7	54350755	rs76059695	7
chr7	54352946	rs150486829	7
chr7	54358561	rs10241291	7
chr7	54364182	rs79667141	7
chr7	54395919	rs35782326	7
chr7	54418024	rs71546178	7
chr7	54418257	rs12536678	7
chr7	54420119	rs1525143	7
chr7	133843541	rs17761994	7
chr8	119413544	rs2450212	7
chr9	314515	rs13290870	7
chr9	13099796	rs10514824	7
chr9	13100791	rs10960946	7
chr9	13108628	rs74977103	7
chr9	109989131	rs2680213	7
